# Supplementary material for: Solanum incanum extract (SR-T100) induces melanoma cell apoptosis and inhibits established lung metastasis
Source: PubMed Central journal article supplement (PMC5732746; doi:10.18632/oncotarget.21508), 2017-10-04
Supplement: oncotarget-08-103509-s001.pdf [file oncotarget-08-103509-s001.pdf]

## ***Solanum incanum* extract (SR-T100) induces melanoma cell apoptosis and inhibits established lung metastasis**

### **SUPPLEMENTARY MATERIALS**

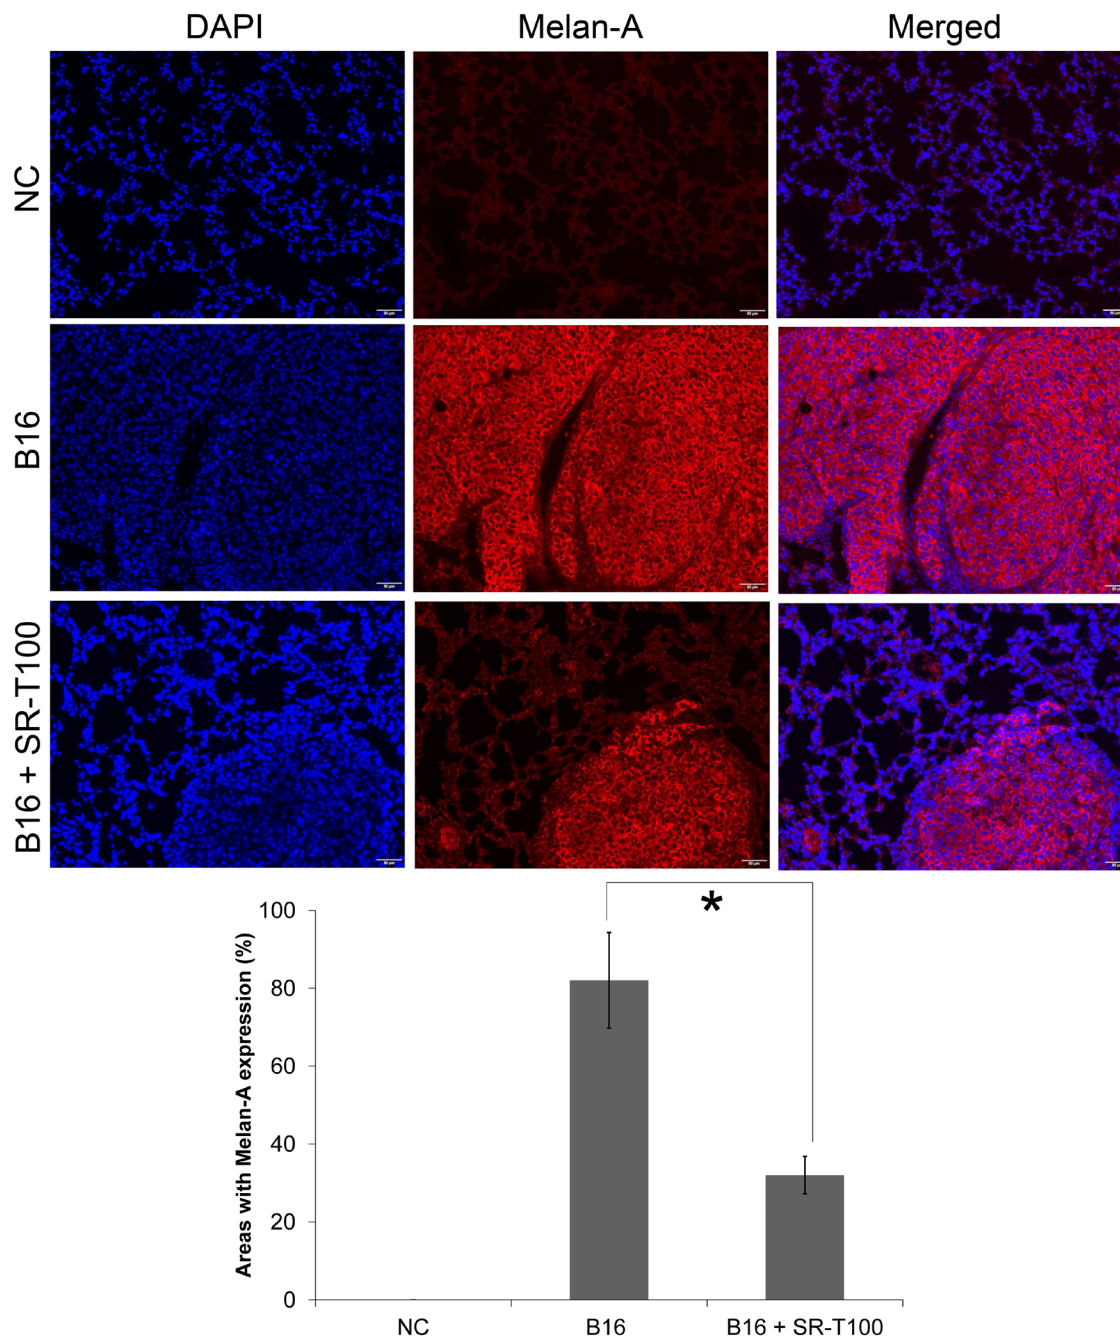

**Supplementary Figure 1: Lung metastases were established by injection of B16 cells via the tail vein.** SR-T100 (B16 + SR-T100 group) or PBS (B16 group) were injected intraperitoneally daily from day 8 to day 18. At day 19, mice were euthanized and the lungs were inspected for tumor burden and stained for Melan-A (100×). Representative data from three experiments are shown. The percentages of area expressing Melan-A were averaged from five power fields for comparisons among three groups. \* denotes  $p < 0.05$ .

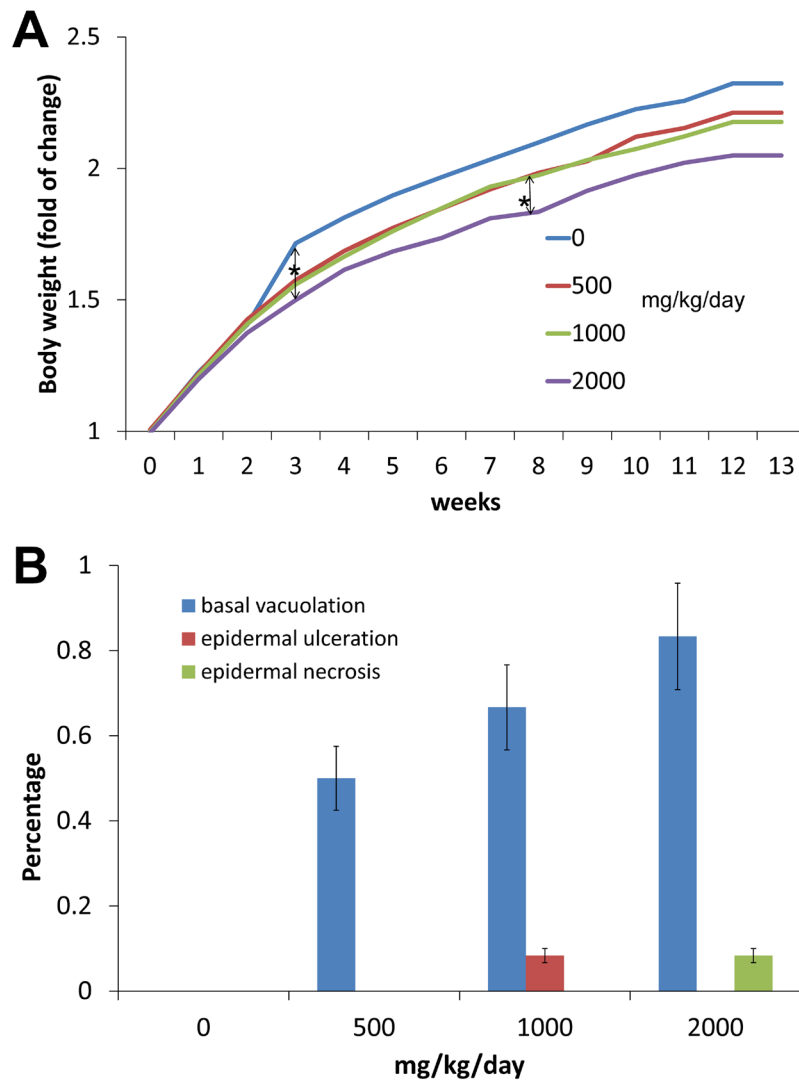

**Supplementary Figure 2: SR-T100 cytotoxicity.** (A) Animals significantly lost weight from the third week to the 13<sup>rd</sup> week in the high dose group (2000 mg/kg/day), and from the 8<sup>th</sup> week to the 13<sup>rd</sup> week in the middle dose group (1000 mg/kg/day). n = 12 for each group, \* indicates  $p < 0.05$  at that time and afterwards. (B) Microscopically, SR-T100 induced basal vacuolation, ulceration, and necrosis of the forestomach in a dose-dependent manner.
